1 Low pathogenic avian influenza virus infection retards colon microbiome diversification  
2 in two different chicken lines

3 Klaudia Chrzastek<sup>a</sup>, Joy Leng<sup>b</sup>, Mohammad Khalid Zakaria<sup>ac</sup>, Dagmara Bialy<sup>a</sup>,  
4 Roberto La Ragione<sup>b</sup>, Holly Shelton<sup>a#</sup>

5 <sup>a</sup>The Pirbright Institute, Pirbright, Woking, UK. <sup>b</sup> University of Surrey, Guildford, UK.

6 <sup>b</sup>Department of Pathology and Infectious Disease, School of Veterinary Medicine,  
7 University of Surrey, Guildford, UK.

8 <sup>c</sup> Current address: University of Glasgow Centre for Virus Research, Glasgow, UK.

9 #Corresponding author: Holly Shelton, [Holly.Shelton@Pirbright.ac.uk](mailto:Holly.Shelton@Pirbright.ac.uk). The Pirbright  
10 Institute, Pirbright, Surrey, UK.

11 Keywords: Influenza virus, H9N2, chicken microbiome, colon microbiome, 16S,  
12 metagenomics.

13

14 Abstract word count: 171

15 Main body word count: 5876

16

17

18

19

20

21

22 **Abstract**

23 A commensal microbiome regulates and is in turn regulated by viruses during host  
24 infection which can influence virus infectivity. In this study, analysis of colon  
25 microbiome population changes following a low pathogenicity avian influenza virus  
26 (AIV) of the H9N2 subtype infection of two different chicken breeds was conducted.  
27 Using 16S rRNA sequencing and subsequent data analysis we found reduced  
28 microbiome alpha diversity in the acute period of AIV infection (day 2-3) in both Rhode  
29 Island Red and VALO chicken lines. From day 4 post infection a gradual increase in  
30 diversity of the colon microbiome was observed, but the diversity did not reach the  
31 same level as in uninfected chickens by day 10 post infection, suggesting that AIV  
32 infection retards the natural accumulation of colon microbiome diversity, which may  
33 further influence chicken health following recovery from infection. Beta diversity  
34 analysis indicated differences in diversity between the chicken lines during and  
35 following acute influenza infection suggesting the impact of host gut microflora  
36 dysbiosis following H9N2 influenza virus infection could differ for different breeds.

37

## 38 **Introduction**

39 Avian influenza A viruses (AIV), belong to the Orthomyxoviridae family, have  
40 segmented, single-stranded, negative sense RNA genomes with enveloped virions [1].  
41 Based on pathogenicity, AIV can be categorised as low and high pathogenicity AIVs.  
42 Among low pathogenicity AIV (LPAIV), the H9 subtype circulates globally in wild birds  
43 and is endemic in domestic poultry in many countries in the Middle Eastern, Africa and  
44 Asia [2-8]. The majority, approximately 75%, of natural H9 isolates, are paired with the  
45 N2 neuraminidase (NA) subtype and are most frequently isolated from chickens,  
46 followed by waterfowl, pigeons, quail, and turkeys [9]. Infected chicken flocks usually  
47 experience mild respiratory distress, diarrhoea, decreased body weight in broilers, and  
48 a drop in egg production in layer hen flocks, the mortality rates are generally low, below  
49 20% [10-14]. However, infected poultry are more susceptible to secondary infections,  
50 including bacterial infection and in such cases the mortality rate can increase up to  
51 65% [15-18]. It has been shown that certain bacteria, such as *Staphylococcus* spp.  
52 can enhance influenza virus activation by indirect proteolytic cleavage and activation  
53 of the hemagglutinin (HA) using the virulence factor, staphylokinase [19].

54

55 The interplay between pathogens and host microbiome play an important role in health  
56 and disease in many vertebrates [25-28]. Compelling evidence has shown that the gut  
57 microbiome can play a role in pathogenesis of various human diseases including those  
58 with primary involvement outside of the gut, such as respiratory, renal, or neurologic  
59 [20-22]. For instance, recent studies reveal that immune protection and severity of  
60 infection by gammaherpesvirus, which can cause severe vasculitis and lethal  
61 pneumonia or respiratory syncytial virus infection of the lungs, can be dependent on  
62 the profile of the human gut microbiome [23, 24].

63 Studies in the chicken model have shown compositional changes in gut microbiome  
64 and differences in some of immune gene expression levels following H9N2 avian  
65 influenza virus (AIV), Newcastle disease virus (NDV) or infectious bronchitis virus  
66 (IBV) infection [29-32]. However, there are many environmental factors, such as age,  
67 breed, diet, housing, hygiene, and temperature that can also affect chicken  
68 microbiome [33, 34] and thus might change the interactions between the host and  
69 viruses during the time of infection. Furthermore, a recent murine study, demonstrated  
70 how polymorphism in host genes shape the intestinal microbiome and how host  
71 genetics influence the output microbiome by comparing genetically identical and  
72 genetically diverse mouse models [35]. It has been shown in chicken model that  
73 genetic background can influence viral pathogenesis [36-40]. For instance, two  
74 different inbred chicken lines, Fayoumi and Leghorn, have been used to evaluate  
75 mechanisms of genetic response to several different pathogens. [41, 42]. Deist, et al.  
76 [38] showed that Fayoumis chickens infected with NDV had a faster viral clearance  
77 than Leghorns chickens and higher serum antibody levels.

78

79 There are many factors contributing to the complex interplay between pathogens and  
80 host microbiome. Understanding of changes in host microbiome resulting from viral  
81 infections is particularly of interest, as it could provide information for developing new  
82 methods for infectious disease prevention and treatment. In this study we used two  
83 different chicken breeds, Rhode Island Red and VALO leghorns, reared in different  
84 facilities, to assess colon microbiome changes following H9N2 AIV infection. We  
85 analysed the commonality and differences in the host microbiome changes during and  
86 following infection of these two chicken lines.

87

## 88 **Results**

89 *H9N2 AIV infection of chickens causes mild clinical signs.*

90 In both of our experiments, all birds survived H9N2 AIV challenge. RIR and VALO  
91 H9N2 infected chickens showed mild lethargy and diarrhoea especially between day  
92 2 and day 4 post-challenge. There were no significant differences in body weight  
93 between control and infected birds for either breed (Supplementary Figure. 1). There  
94 were significant differences in body weight between the RIR and VALO chickens. At  
95 day 0 the RIR control group were on average 54.31 g ( $\pm 5.5$  g SEM) heavier than the  
96 VALO control group ( $p < 0.0001$ ) whereas at day 14 the RIR control group was 180.3  
97 g ( $\pm 38.2$  g SEM) heavier than the VALO control group ( $p = 0.0421$ ) (Supplementary  
98 Figure 1).

99 *VALO chickens shed H9N2 virus infection from the buccal cavity, a day longer than*  
100 *RIR chickens.*

101 Buccal viral shedding was determined by testing oropharyngeal (OP) swabs at day  
102 two, day three, day four, day five and day six post-challenge by plaque assay on  
103 MDCK cells (Figure 1). In experiment 1 where only RIR chickens were infected, all  
104 chickens shed virus from the OP cavity on day two with the average titre shed being  
105  $6.2 \times 10^4$  pfu/ ml ( $\pm 12730$  pfu/ ml SEM). Virus titre declined on day four and day five,  
106 with no virus being recovered from samples taken on day six post infection (Figure  
107 1A). In experiment 2, both RIR and VALO chickens were challenged with the same  
108 dose of the same H9N2 virus. At day two post challenge, all chickens in both lines  
109 shed virus from the OP cavity with no statistical difference in titre shed between the  
110 chicken lines being observed (average titres being  $4.3 \times 10^3$  pfu/ ml ( $\pm 921$  pfu/ ml  
111 SEM) for RIR and  $2.7 \times 10^3$  pfu/ ml ( $\pm 1086$  pfu/ ml SEM) for VALO). Similarly, to

112 experiment 1 virus titres in the OP cavity declined on days four and five with no  
113 observed virus shedding on day six post challenge for either line. We did see  
114 differences in the rate of viral clearance between the RIR and VALO chicken lines from  
115 day four post challenge onwards. On day four the mean OP virus shed was  $1.6 \times 10^3$   
116 pfu/ ml ( $\pm 1129$  pfu/ ml SEM) for the RIR compared to  $3.6 \times 10^3$  pfu/ ml ( $\pm 1121$  pfu/ ml  
117 SEM) for the VALO (p value = 0.2465). On day five only 1 out of 8 RIR birds shed virus  
118 to titres above the limit of detection for the plaque assay whereas 7 out of 8 VALO  
119 birds did (average virus shed was  $1.3 \times 10^2$  pfu/ ml) (Figure 1B). Cloacal viral shedding  
120 of virus by all the birds in both experiments was conducted by qRT-PCR for viral M  
121 gene, but only a single RIR bird on day four post challenge had a positive result (data  
122 not shown).

123 Antibody responses to the H9N2 virus prior to challenge and at 10 days (Experiment  
124 1) and 14 days (Experiment 2) post-challenge were measured by Hemagglutination  
125 inhibition (HI) assay. All infected birds in both experiments seroconverted with an  
126 average HI titre above  $8 \log_2$  (Supplementary Figure 2). No significant differences  
127 between RIR and VALO infected birds were found.

128

129 *Batch processing of colon tissue from chickens did not affect the median number of*  
130 *operational taxonomic units (OTUs) obtained from 16S rRNA amplicon sequencing.*

131 Following euthanasia of chickens at various time-points colon samples were  
132 aseptically sampled at *post-mortem* examination, homogenised and the microbial  
133 DNA extracted. The bacterial DNA was processed to give 16S rRNA amplicons and  
134 subjected to Illumina Miseq sequencing. We performed a pre-processing and quality  
135 check on the raw reads obtained from the Illumina Miseq platform, which removed  
136 about 20% of the sequences. All sequences were then normalized to 62,000

137 sequences per sample resulting in a total number of 4,094,860 OTUs with a median  
138 of 119,082.000 OTUs per sample in Experiment 1 (Batch 1), 5,970,048 of OTUs with  
139 a median of 156,783 OTUs per sample in H9N2 infected groups (Batch 2) and  
140 8,313,621 of OTUs with a median of 173,833.5 per sample in control groups in  
141 Experiment 2 (Batch 3) (Supplementary Figure 3). This raw data was then used in our  
142 described pipelines (Material and Methods) to analyse changes in the biodiversity of  
143 the chicken colon microbiome following H9N2 infection and whether chicken breed  
144 impacted these changes.

145 *Microbiome Alpha diversity indices increased over time in healthy chicken colon.*

146 A temporal change in diversity measure, number of OTUs, phylogenetic diversity and  
147 Shannon diversity, were observed in control groups in both experiments (Figure 2 and  
148 Figure 4). When RIR and VALO chicken colon microbiome composition was analysed  
149 weekly (Experiment 2), we identified that statistically significant changes in alpha  
150 diversity indices in control groups occur in the time frame of 14 days, especially  
151 between day 7 and day 21 of age, suggesting that a two weeks' period was required  
152 to see significant maturity changes in healthy colon microbiome (Supplementary Table  
153 1). Kruskal Wallis statistical testing showed a statistically significant temporal changes  
154 in number of OTUs (the number of bacterial species detected in a sample, species  
155 richness) between day 7 and day 21, day 7 and day 28 and day 7 and 32 of age in  
156 RIR chickens and between day 7 and day 21, day 7 and day 28 of age in VALO  
157 chickens (Supplementary Table 1). Similarly, phylogenetic significant changes were  
158 seen between day 7 and day 21, day 7 and day 28 and day 7 and 32 of age and day  
159 14 and day 28 in RIR chickens And for VALO chicken between day 7 and day 21 of  
160 age (Supplementary Table 1). Shannon index, a measure of species distribution in a  
161 sample, significantly increased between day 7 and day 21 of age in both chicken

162 breeds suggesting a more even community evolves over time (Supplementary Table  
163 1). Spearman correlation coefficient ( $r_s$ ) between time and number of detected OTUs  
164 was 0.5968 ( $p < 0.0001$ ) and time and phylogenetic diversity was 0.6544 ( $p < 0.0001$ )  
165 in control RIR and VALO groups.

166 The association between time and microbial diversity was also tested via simple linear  
167 regression (Supplementary Table 2), with microbial alpha diversity (the number of  
168 OTUs and phylogenetic diversity metrics) used as the dependent variable (Figure 3  
169 and 4). In control groups, the number of OTUs, phylogenetic diversity and Shannon  
170 index significantly correlated with time ( $p > 0.001$ ) (Figure 2 and 4). However, individual  
171 variation within the colon microbiome, especially VALO line at later time points (day  
172 28 and day 32 of age) was greater as compared to age of 7- or 14-days-old.

173 *Colon microbiome alpha diversity indices are significantly lower during the acute*  
174 *phase of H9N2 infection in chickens which is not altered in two different chicken*  
175 *breeds.*

176 First alpha diversity was quantified by the total number of observed species (OTUs) in  
177 each sample in experiment 1 (H9N2 infected versus sham infected RIR chickens)  
178 (Figure 2A). We observed a significant reduction ( $p < 0.05$  as determined Kruskal Wallis  
179 testing), in OTU number in colon samples from chickens at 2 days post influenza virus  
180 challenge (Figure 2A and Supplementary Table 3), which corresponds with high levels  
181 of viral shedding (Figure 1A), compared to the sham infected group at the same  
182 timepoint. The OTU numbers at day four and ten post challenge were not significantly  
183 different to the control group however, we observed higher variability in interquartile  
184 range of OTU numbers with the infected groups at days four and ten compared to the  
185 corresponding control groups and compared to the day 2 groups. This suggests that



186 the acute reduction in number of OTU on day two occurred more uniformly than the  
187 recovery of OTU numbers post infection in individuals (Figure 2A). Faith`s  
188 phylogenetic index of observed species which describes OTU diversity and Shannon  
189 diversity index which indicates OTU evenness were also measured (Figure 2B and  
190 2C). Kruskal Wallis statistical testing showed statistically significant ( $p < 0.01$ ) reduced  
191 phylogenetic alpha diversity in H9N2 infected RIR chicken at acute phase of infection  
192 (day 2 post-challenge) and at day 10 post challenge as compared to control groups at  
193 the same time point measured (Figure 2B and Supplementary Table 3). We observed  
194 no statistical difference in the Shannon Index between any of the infected groups and  
195 associated controls (Figure 2C and Supplementary Table 3). Simple linear regression  
196 analysis showed that the Shannon index and the number of OTUs increased over the  
197 course of H9N2 infection in infected RIR group, similarly to the control group (Figures.  
198 2D, 2F and Supplementary Table 2). The number of OTUs significantly correlated with  
199 time, as determined by linear regression ( $R^2=0.666$ ,  $p < 0.0001$ , equation  $Y = 5.914 * X$   
200  $+ 74.92$  for control RIR chickens, and  $R^2 = 0.510$ ,  $p = 0.0004$ , equation  $Y = 5.914 * X$   $+ 62.44$   
201 for H9N2 infected RIR chickens) (Figure 2D and Supplementary Table 2). The  
202 Faith`s phylogenetic diversity significantly correlated with time for both the control and  
203 infected group but the increase in phylogenetic diversity of the infected group was  
204 retarded as compared to the control group, suggesting that diversity development of  
205 the chicken colon microbiome was reduced by H9N2 virus infection ( $R^2= 0.6894$ ,  $p$   
206  $< 0.000$ , equation  $Y = 0.3286 * X + 5.220$  for control group, and  $R^2= 0.2114$ ,  $p = 0.0414$ ,  
207 equation  $Y = 0.1057 * X + 4.653$  for the H9N2 infected group) (Figure 2E and  
208 Supplementary Table 2).

209 Figure 3 shows the alpha diversity measurements compared for RIR and VALO  
210 chicken breeds infected with H9N2 at day zero, day three and day fourteen post

211 challenge. As it was seen in experiment 1, the number of OTUs and phylogenetic  
212 diversity dropped during the acute phase of infection (day 3 post infection) following  
213 H9N2 AIV challenge in both chicken lines (Figure 3A and 3B) however this was not  
214 statistically significant (Supplementary Table 3). Between the chicken breeds no  
215 statistically significant differences in alpha diversity metrics before the challenge (day  
216 zero, D0) and during the acute phase of infection (day 3 post-challenge) (Figure 3)  
217 were observed, both lines responded in a similar fashion to infection by H9N2 AIV.  
218 Interestingly, an increased Faith's phylogenetic (Figure 3B) and Shannon diversity  
219 (Figure 3C) indices were found in VALO chickens as compare to RIR chickens at  
220 recovery phase of H9N2 infection (day 14 post-challenge) ( $p < 0.05$ ) (Supplementary  
221 Table 3).

222 *Beta diversity gut community changes are associated with H9N2 AIV infection and*  
223 *chicken breed.*

224 To compare the beta diversity among the groups at different time points, we performed  
225 Principal Coordinates Analysis (PCoA) and Principal component analysis (PCA) using  
226 the unweighted Unifrac data of taxonomic composition that includes phylogenetic  
227 diversity metrics (Figure 5). A significant separation in the control groups was  
228 observed over the time of birds' maturity (Figure 5A). Significant differences in beta  
229 diversity within the RIR and VALO breed control groups were found in time-based  
230 manner of at least 7 days interval. Analysis of variance have shown significant  
231 differences between day 7 and 14, day 21 and 32, day 14 and 21, day 28 and 32 but  
232 not between day 28 and 32 in both chicken breed control groups (Supplementary  
233 Table 4). The only statistically significant difference between RIR and VALO chicken  
234 breeds was seen at day 21 of age for the control groups (Figure 5A and Supplementary  
235 Table 4).

236 PCoA plots indicate a significant separation between control and H9N2 RIR infected  
237 chickens at all time points tested (day two, day four, and day ten post challenge) for  
238 experiment 1 (Figure 5B). Analysis of variance (PERMANOVA) for measuring beta-  
239 diversity showed that the H9N2 RIR infected group had significantly lower diversity as  
240 compared to RIR control group at all time points tested (Supplementary Table 4).  
241 Similarly, significant separation in beta diversity was observed between day zero and  
242 day three post challenge for both RIR and VALO H9N2 infected chickens (Figure 5C).  
243 Analysis of variance showed significant lower diversity in RIR and VALO infected  
244 groups as compared to sham infected groups at the same time point tested  
245 (Supplementary. Table 4).

#### 246 *Bacterial taxa associated with H9N2 infection.*

247 A mean relative abundance of the dominant bacteria at phyla, class, order, and family  
248 levels between H9N2 AIV RIR infected and control chickens (Experiment 1) is shown  
249 in Supplementary Figure 4 whereas between RIR and VALO H9N2 infected chickens  
250 and its corresponding controls (Experiment 2) is shown in Supplementary Figure 5.  
251 Analysis of composition of microbiomes (ANCOM) was applied against group and day  
252 of infection variables to determine which bacteria were significantly differentiated in  
253 relative abundance at genus level (Figure 6). The ANCOM results showed significant  
254 differences between the control and H9N2 infected RIR groups in members of the  
255 *Firmicutes* phylum. Six of *Firmicutes* phylum, *Peptostreptococcaceae*  
256 (*Terrisporobacter*), *Planococcaceae* (*Lysinibacillus*), *Erysipelotrichaceae*  
257 (*Turicibacter*), *Lachnospiraceae* (*Cellulosilyticum*), *Paenibacillaceae* (*Paenibacillus*),  
258 *Clostridiaceae* 1 (*Clostridium sensu stricto* 1), were significantly different between the  
259 RIR control and H9N2 infected groups and had a high W-statistics and f-score (Figure  
260 6A). Detailed significant statistics of ANCOM percentile of different taxa is shown in

261 (Supplementary Table 5). Furthermore, we also performed Linear discriminant  
262 analysis Effect Size (Lefse) analysis based on OTUs to compare the microbial  
263 communities between RIR control and RIR H9N2 infected birds at each time point  
264 tested. The LEfse analysis and ANCOM generated similar results (Figure 6 and Figure  
265 7). LEfse results indicated differences in the phylogenetic distributions of the  
266 microbiome of H9N2 infected and control chickens at the OTU level (Figure 7). The  
267 gut microbial communities in H9N2 infected birds were different compared to those in  
268 control groups. A histogram of the LDA scores was computed for features that showed  
269 differential abundance between H9N2 infected and control chickens (Figure 7A and  
270 7B). The LDA scores indicated that the relative abundances of Streptococcaeae  
271 (*Streptococcus*), and Planococcaceae (*Lysinibacillus*) were much more enriched in  
272 H9N2 infected birds versus control at day 2 post-challenge (Figure 7A) and the most  
273 differentially abundant bacteria taxa (LDA score  $[\log_{10}] > 3$ ). The most differentially  
274 abundant bacterial taxon in control birds was characterized by a preponderance of  
275 Peptostreptococcaceae (LDA score  $[\log_{10}] > 3$ ) at day 2 post-challenge (Figure 7A).  
276 The differences in the phylogenetic distributions of the microbiomes of H9N2 infected  
277 and control chickens at the OTU level were also found at day 4 post-challenge (Figure  
278 7B). The LDA scores indicated that the relative abundances of Penicibacillacea  
279 (*Penicibacillus*), Planococcaceae (*Lysinibacillus*), Erysipelotrichaceae (*Turicibacter*),  
280 Clostridiaceae (*Clostridium sensu stricto* 1) were much more enriched in H9N2  
281 infected birds as compared to control birds at day 4 post-challenge (Figure 7B). The  
282 control birds were characterized mainly by a preponderance of different Clostridia and  
283 Bacillaceae (*Bacillus*) (LDA score  $[\log_{10}] > 3$ ). In addition, we saw differential  
284 abundance of bacterial taxa between H9N2 infected RIR and VALO and their relative  
285 control groups in our second experiment (Figure 8). The LDA scores indicated that the

286 relative abundances of Clostridiales (*Clostridium sensu stricto* 1) and Planococcaceae  
287 (*Lysinibacillus*) (LDA score [log<sub>10</sub>] > 3.5) were much more enriched in RIR infected  
288 birds at day 3 post challenge as compared to the control group, and this correspond  
289 to our results obtained in first experiment at day 4 post-challenge (Figure 7B). In VALO  
290 infected chicken, LDA scores indicated that the relative abundances of  
291 Aerococcaceae, Paenibacillaceae, Bacillaceae (LDA score [log<sub>10</sub>] > 3.5) were much  
292 more enriched at day 3 post-challenge whereas Clostridiales, Peptostreptococcae and  
293 Brevibacteriaceae (LDA score [log<sub>10</sub>] > 3.5) were significantly reduced in the VALO  
294 infected group compared to control group at day 3 post challenge (Figure 8).

## 295 **Discussion**

296 A tremendous number of microorganisms (bacteria, viruses, and fungi), collectively  
297 termed the microbiome, are associated with the various host mucosal surfaces and  
298 play an important role in host homeostasis [28, 43, 44]. Those microorganisms  
299 undergo dynamic changes due to numerous factors, including ageing, changes in diet,  
300 environment, or infection by pathogens [28, 45-47]. Recent studies have shown that  
301 interaction between host microbiome and viruses may play a crucial role in dictating  
302 disease pathogenesis in mammalian hosts [24, 48, 49]. As in all vertebrates, chicken  
303 mucosal surfaces are share by diverse and dynamic population of microbiome [50-  
304 52]. In this study, we observed that chicken gut microbiome diversity changes during  
305 host maturity, from day 7 post hatch to day 32 post hatch (Figure 4). The alpha  
306 diversity, measured as the number of bacterial taxa, phylogenetic diversity and  
307 Shannon index in healthy colon increased over the time of chicken growth in both  
308 chicken breeds (RIR and VALO), with most changes being seen in 14 days interval.  
309 Temporal increases in the Shannon index suggests a more even bacterial microbiome  
310 community evolving with age. Like our findings, Xi, et al. [53] showed that major

311 changes in chicken gut microbiome development were observed between day 14 and  
312 day 28 post hatch. We found that beta diversity also strongly correlates with time, with  
313 the major changes observed in 7 days intervals. Although ageing shaped both alpha  
314 and beta diversity in chickens, beta diversity changes occur more rapidly than alpha.  
315 The only statistically significant difference in beta diversity of the gut microbiome  
316 between RIR and VALO chicken breeds was seen at day 21 of age (Figure 4).

317 H9N2 AIV infection in chickens occurs via the respiratory route and the predominant  
318 site of initial viral replication is mucosal surface of the oropharyngeal cavity, followed  
319 by infection and replication in other sites of the respiratory and intestinal tracts [13,  
320 54]. H9N2 infection in chickens clinically manifests with nonspecific symptoms [55],  
321 we observed a mild lethargy and diarrhoea especially between day 2 and day 4 post-  
322 challenge in infected chickens of both breeds. Neither breed lost body weight or failed  
323 to gain body weight in comparison to the uninfected control groups following H9N2  
324 AIV challenge, Supplementary Figure 1, suggesting that infected chicken consume  
325 similar amount of feed as their controls and that this behaviour does not account for  
326 the changes in microbiome composition following challenge as it has observed in the  
327 influenza infected mice model [56]. Both breeds shed the virus via the oropharyngeal  
328 route, but not via cloaca which agrees with other LPAIV infection studies where little  
329 or no shedding was observed from cloacal cavity (Figure 1) [57-59].

330 Although we showed in this study that the number of bacterial taxa and Faith's  
331 phylogenetic diversity index significantly correlated with time, this correlation was  
332 impaired by H9N2 AIV infection. H9N2 infection decreased the number of bacteria  
333 taxa during the acute phase of infection (peak viral shedding) and phylogenetic  
334 diversity at both acute and recovery phase of infection (Figures 2 & 3). This suggests  
335 that the colon microbiome of H9N2 AIV infected birds lost its overall richness at the

336 acute phase of infection and the microbiome reconstruction appears via increased  
337 numbers of predominant bacteria resulting in greater microbiological evenness but not  
338 via increased phylogenetic diversity compared to control birds. Zhao, et al. (2018)  
339 have shown that species richness of faecal microbiome in swans positive for H5N1  
340 AIV infection tended to be lower than that in healthy controls [60]. Furthermore, it was  
341 shown that approximately 1,100 of the OTUs identified in the healthy-control swan  
342 samples were not detected in AIV H5N1-positive samples [60]. Hird, et al. (2018) have  
343 shown that overall species richness in duck species infected with AIV differs within the  
344 duck species and for instance only *Anas platyrhynchos* and *Anas carolinensis* showed  
345 a significant decrease in alpha diversity in the AIV positive individual [61]. In the current  
346 study, we also showed increased Shannon index and phylogenetic diversity in VALO  
347 infected chicken as compared to RIR at day 14 post challenge that might suggest  
348 different microbiome recovery dynamics occurred between two chicken breeds (Figure  
349 3). Furthermore, we also observed that beta diversity changes are associated with  
350 H9N2 AIV infection at all time points measured in this study (Figure 5). Like our study,  
351 differences in microbiome composition between the control group and H9N2 infected  
352 chickens was seen in ileal contents [30], cecum content [29] and faecal swab samples  
353 [62] by others. In contrast, Zhao, et al. (2018) did not notice beta diversity changes in  
354 faecal swab samples obtained from migrating whooper swans infected with H5N1  
355 influenza virus [60]. Furthermore, Hird, et al. [2018] have shown that the microbiome  
356 may have a unique relationship with influenza virus infection at the species level [61].  
357 All those findings might suggest that relationship between host microbiome and  
358 influenza virus infection might depends on host genetic background of the avian  
359 species that is infected by AIV [61] and the strain of infecting AIV. However, these  
360 associations require further evaluation.

361 In this study, taxonomic analysis showed significant changes in diversity and  
362 abundance the healthy colon chicken followed H9N2 LPAIV infection regardless the  
363 chicken line infected (Figures 7 & 8). Healthy chicken colon in both chicken lines was  
364 characterized by predominance of *Proteobacteria* phylum (Enterobacteriales order)  
365 and *Firmicutes* phylum (Lactobacillales, Bacillales and Clostridiales orders) and the  
366 major differences between H9N2 infected and non-infected chickens were seen in  
367 *Firmicutes* phylum. In general, RIR chicken microbiome at acute phase of H9N2  
368 LPAIV, expanded Bacillales, among the others. Specifically, Bacillales (*Lysinibacillus*)  
369 and Lactobacillales (Streptocococae) (at day 2 post infection), Clostridiales  
370 (*Clostridium sensu stricto* 1) and Bacillales (*Lysinibacillus*) at day 3 post infection and  
371 Bacillales (*Lysinibacillus* and *Penbacillus*) at day 4 post infection. The question why  
372 Bacillales (*Lysinibacillus*) or Streptocococae are overrepresented during acute phase  
373 of influenza infection is open and needs further evaluation.

374

375 In the current study, we observed a dynamic change in chicken colon between acute  
376 and recovery phase of AIV infection suggesting that different bacteria taxa might play  
377 a role in recovery from infection. Interestingly, phylogenetic abundance distributions  
378 of the microbiome in chicken colon differ substantially at day 3 post challenge between  
379 RIR and VALO infected chickens (Clostridiales in RIR versus Bacillales and  
380 Enterobacteriales in VALO) but was similar at recovery (day 14 post challenge) in both  
381 chicken lines, mostly represented by high abundance of Bacillales and Clostridiales  
382 (*Clostridium sensu stricto* 1). At the same time healthy colon was enriched by  
383 Clostridiales (Peptostreptococcae) in RIR and Lactobacillales in both chicken lines. It  
384 was previously shown in mice model that *Lactobacillus* spp. have probiotic potential



385 and can improve immune control in influenza infected individuals and thus could aim  
386 microbiome recovery following infection [63-65].

387

388 In conclusion, we have shown for the first-time dysbiosis in healthy colon microbiome  
389 following AIV of H9N2 subtype in two divergent chicken lines. We observed  
390 significantly reduced alpha and beta biodiversity during infection. Although bird breed  
391 did not influence the general trend observed in alpha diversity, it has an impact on  
392 beta diversity. *Firmicutes* phylum was the most differentially abundant between  
393 infected and non-infected individuals. Lactobacillales was missing at recovery phase  
394 of infection for both breeds suggesting supplementation of this taxa in during recovery  
395 could be beneficial. Predominance of different bacteria taxa at different time points  
396 during influenza infection suggests there is an involvement of chicken gut microbiome.  
397 Modulating the composition of the gut microbiome using probiotics might serve to  
398 promote a healthy community that confers protection or mitigates disease from  
399 influenza virus infection in chickens.

## 400 **Materials and Methods**

### 401 *Ethics Statement*

402 All animal work was approved and regulated by the UK government Home Office  
403 under the project license (P68D44CF4) and reviewed by the Pirbright Animal Welfare  
404 and Ethics Review Board (AWERB). All personnel involved in the procedures were  
405 licensed by the UK Home Office.

### 406 *In vivo chicken study design*

407 Two separate *in vivo* experiments were performed. In Experiment 1, we used specific  
408 pathogen free (SPF) Rhode Island Red (RIR) chickens to assess the effect on H9N2

409 infection on RIR host colon microbiome. A total of 45 one-day-old SPF RIR chickens  
410 were host in pens until 2-weeks of age when chickens were randomly allocated into  
411 two experimental groups: control (n=25) and H9N2 challenged (n=20). Five control  
412 group birds were culled before the challenge at 3-weeks of age to establish the starting  
413 microbiome profile. Colon samples were collected at day 2 (n=10), day 4 (n=10) and  
414 day 10 (n=20) post challenge from both infected and control groups. In Experiment 2,  
415 SPF RIR were compared to SPF VALO chickens to assess differences in host  
416 microbiome following H9N2 infection in the two different chicken breeds. A total of  
417 104 one-day-old SPF chickens (n=52, RIR and n=52, VALO) were host separately in  
418 two pens. Colon samples were collected from each breed control group (n=5, RIR and  
419 n=5, VALO) at day 7, 14, 21, 28 and 32 of age. At three weeks of age, 18 birds from  
420 each group were randomly selected and H9N2 challenged. The colon samples from  
421 challenged birds were collected before the challenge (day 0), at day 3 post-challenge  
422 and day 14 post-challenge.

423 RIR chickens were provided as day old chicks from the National Avian Resource  
424 Facility (NARF) located at The Roslin Institute, Edinburgh, UK whilst VALO chickens  
425 were delivered as fertilised eggs from VALO BioMedia GmbH (Germany) which were  
426 set and hatched at the Biological Service Unit (Poultry) at The Pirbright Institute (UK).  
427 The feed was provided *ad libitum* according to manufacture instruction for the chicken  
428 age. Both RIR and VALO chicks move from starter feed to grower at 3 weeks old. In  
429 both experiments AIV challenged chickens were housed in self-contained BioFlex®  
430 B50 Rigid Body Poultry isolators (Bell Isolation Systems) maintained at negative  
431 pressure. The H9N2 challenged birds received 100µl of 10<sup>4</sup> pfu (50µl in each nare) of  
432 H9N2 AIV, A/chicken/Pakistan/UDL01/08. Blood samples were taken from a wing vein  
433 pre-challenge and at day 14 post-challenge for serum collection. All birds were

434 swabbed daily from day of challenge until 8 days post infection in both cloacal and  
435 buccal cavities to determine viral shedding. Swabbing was carried out with sterile  
436 polyester tipped swabs (Fisher Scientific, UK) which were transferred into viral  
437 transport media (Who, 2006), vortexed briefly, clarified by centrifugation and stored at  
438 -80 °C prior to virus detection. At appropriate timepoints chickens were humanly  
439 euthanized either by intravenous administration of sodium pentobarbital if housed in  
440 isolators or by cervical dislocation in the case of the control groups. All colon samples  
441 were collected from the distal part of colon (2-cm sections of each chicken), and then  
442 snap-frozen. Samples were stored at -80°C until subsequent analysis. Body weights  
443 were monitored daily until the end of experiment.

#### 444 *Virus and cells*

445 Recombinant A/chicken/Pakistan/UDL01/08 H9N2 virus was generated using reverse  
446 genetics as previously described [66]. Virus stocks were produced via passage in 10  
447 day old embryonated chicken eggs; the allantoic fluid harvested after 48 hours and  
448 titrated by plaque assay on MDCK cells (ATCC).

449 Madin-Darby Canine Kidney (MDCK) cells (ATCC) were maintained in DMEM (Gibco-  
450 Invitrogen, Inc.) supplemented with 10% foetal bovine serum (Biosera, Inc.), 1%  
451 penicillin/streptomycin (Sigma-Aldrich, Inc.) and 1% non-essential aa (Sigma-Aldrich,  
452 Inc.).

#### 453 *Serology*

454 Haemagglutinin inhibition (HI) assays were carried out using challenge virus  
455 A/Chicken/Pakistan/UDL01/08(H9N2) antigen. HI assays were performed according  
456 to standard procedures [68]. Titres were expressed as log<sub>2</sub> geometric mean titres  
457 (GMT). Samples with titres below 3 log<sub>2</sub> GMT were considered negative.

458 *Virus shedding*

459 Buccal swab samples from both challenge experiments were titrated by plaque assay  
460 on MDCK cells. MDCKs were inoculated with 10-fold serially diluted samples and  
461 overlaid with 0.6% agarose (Oxoid) in supplemented DMEM (1× MEM, 0.21% BSA V,  
462 1 mM L-Glutamate, 0.15% Sodium Bicarbonate, 10 mM HEPES, 1×  
463 Penicillin/Streptomycin (all Gibco) and 0.01% Dextran DEAE (Sigma-Aldrich, Inc.),  
464 with 2 µg/ml TPCK trypsin (SIGMA). They were then incubated at 37 °C for 72 h.  
465 Plaques were developed using crystal violet stain containing methanol. Viral titres  
466 were expressed as log<sub>10</sub> plaque forming units (PFU) per ml and the limit of detection  
467 is 0.9 log<sub>10</sub> PFU per ml for this assay.

468 Cloacal swab samples from both challenge experiments were titrated by qRT-PCR  
469 assay for the viral matrix (M) protein. qRT-PCR analysis was completed using the  
470 Superscript III Platinum one-step qRT-PCR kit (Life Technologies). Cycling conditions  
471 were: (i) 5-min at 50°C, (ii) a 2-min step at 95°C, and (iii) 40 cycles of 3 sec at 95°C,  
472 30 s of annealing and extension at 60°C. Cycle threshold (CT) values were obtained  
473 using 7500 software v2.3. Mean CT values were calculated from triplicate data. Within  
474 viral M segment qRT-PCR, an M segment RNA standard curve was completed  
475 alongside the samples to quantify the amount of M gene RNA within the sample from  
476 the CT value. T7 RNA polymerase-derived transcripts from UDL-01 segment 7 were  
477 used for preparation of the standard curve.

478 *DNA extraction and 16S rRNA gene amplification*

479 Samples were extracted in batches (experiment 1, one batch and experiment 2, two  
480 batches). DNA was extracted using the PowerSoil® DNA Isolation Kit (Mo Bio)  
481 according to manufacturer instruction. DNA extraction reagent only controls were

482 included for each batch of DNA extractions along with ZymoBIOMICS Microbial  
483 Community Standards (Zymo Research) and E. coli DH5 $\alpha$  (ThermoFisher). The V2-  
484 V3 region of the 16S rRNA gene was amplified via PCR as described previously by  
485 Glendinning et al. (2016) [51]. Briefly, a nested PCR protocol was performed using the  
486 V1-V4 primers 28F (‘5–175 GAGTTTGATCNTGGCTCAG-3’) and 805R (‘5-  
487 GACTACCAGGGTATCTAATC-3’) followed by the V2-V3 primers 104F (‘5-  
488 GGCGVACGGGTGAGTAA-3’) and 519R (‘5–177 GTNTTACNGCGGCKGCTG-3’)  
489 with Illumina adaptor sequences and barcodes.

#### 490 *Sequencing and data analysis*

491 Libraries were analysed on a High Sensitivity DNA Chip on the Bioanalyzer (Agilent  
492 Technologies) and Qubit dsDNA HS assay (Invitrogen). The amplicon libraries were  
493 pooled in equimolar concentrations, before loading on the flow cell of the 500 cycle  
494 MiSeq Reagent Kit v2 (Illumina, USA) and pair-end sequencing (2  $\times$  250 bp). The  
495 amplicon-based sequencing was performed using the Illumina MiSeq platform at The  
496 Pirbright Institute. Bioinformatic analysis was implemented using the Quantitative  
497 Insights into Microbial Ecology (QIIME) platform version qiime2-2019.10. Low-quality  
498 sequencing reads were quality trimmed and denoise using DADA2. Potential chimeric  
499 sequences were removed using UCHIME, and the remaining reads assigned to 16S  
500 rRNA operational taxonomic units (OTUs) based on 97% nucleotide similarity with the  
501 UCLUST algorithm and then classified taxonomically using the SILVA reference  
502 database (silva-132-99-nb-classifier). Taxonomy was then collapsed to the genus-  
503 level. The microbial community structure was estimated by microbial biodiversity (i.e.,  
504 species richness and between-sample diversity). Shannon index, phylogenetic  
505 diversity, and the observed number of species were used to evaluate alpha diversity,  
506 and the unweighted UniFrac distances were used to evaluate beta diversity. All these

507 indices (alpha and beta diversity) were calculated by the QIIME pipeline. Data was  
508 visualized using R package “ggplot2” ver 3.2.1 [67].

### 509 *Statistical analysis*

510 Kruskal Wallis pairwise statistics were used to assess differences in community  
511 richness (Shannon diversity, phylogenetic diversity, and the observed number of  
512 species, OTU). In addition, Spearman correlation coefficient and simple linear  
513 regression was used to evaluate temporal changes in community richness that  
514 occurred during AIV infection between control and infected birds. A multivariate  
515 ANOVA (PERMANOVA) analysis was used to determine significant differences in  $\beta$   
516 diversity distances across groups. Principal-coordinate analysis (PCoA) graphs were  
517 constructed to visualize similarity between the samples over the time of AIV infection.  
518 Additionally, Principal Component Analysis (PCA) was performed using OTU matrix.  
519 The Linear Discriminant Analysis Effect Size (LEfSe) algorithm and analysis of  
520 composition of microbiomes (ANCOM) were used to identify differentially abundant  
521 taxa between the groups. For LEfSe analysis, depends on the experiments, different  
522 groups were assigned as comparison classes and were analysed by days. Briefly, in  
523 experiment 1, RIR control and RIR AIV infected groups were assigned as comparison  
524 classes and assessed at day 0, day 2, day 4 and day 10 post-challenge. In experiment  
525 2, RIR control and VALO control groups were assigned as comparison classes and  
526 analysed at 7, 14, 21, 28 and 32 day of age whilst RIR and VALO AIV infected groups  
527 that represented separate classes were analysed at day 0, day 3 and day 14 post-  
528 challenge. LEfSe identified features that were statistically different between assigned  
529 groups and then compared the features using the non-parametric factorial Kruskal-  
530 Wallis sum-rank test (alpha value of 0.05) and Linear Discriminant Analysis (LDA)  
531 >2.0.

532 **Funding Information**

533 This work described herein was funded by The Pirbright Institute BBSRC ISP grant  
534 BBS/E/I/00007030, BBS/E/I/00007034, BBS/E/I/00007038 and BBS/E/I/00007039.

535 **Acknowledgments**

536 We would like to acknowledge colleagues at The Pirbright Institute who supported the  
537 *in vivo* work; Elizabeth Billington, Dr Jean-Remy Sadeyen, Professor Munir Iqbal and  
538 the poultry unit team and Illumina MiSeq sequencing; Dr Graham Freimanis.

539 **Author contributions**

540 The work was conceptualized by HS and KC. Experimental work was executed by KC,  
541 MZ, DB, JL, RLR, KC, and HS. The Manuscript was written by KC and HS and edited  
542 by all authors.

543 **References**

- 544 [1] D. E. Swayne, "Avian Influenza," *John Wiley & Sons, Inc*, 2008.
- 545 [2] K. Chrzastek, D. H. Lee, S. Gharaibeh, A. Zsak, and D. R. Kapczynski,  
546 "Characterization of H9N2 avian influenza viruses from the Middle East  
547 demonstrates heterogeneity at amino acid position 226 in the hemagglutinin  
548 and potential for transmission to mammals," *Virology*, vol. 518, pp. 195-201,  
549 May 2018, doi: 10.1016/j.virol.2018.02.016.
- 550 [3] A. Suttie *et al.*, "The evolution and genetic diversity of avian influenza A(H9N2)  
551 viruses in Cambodia, 2015 - 2016," *PLoS One*, vol. 14, no. 12, p. e0225428,  
552 2019, doi: 10.1371/journal.pone.0225428.

- 553 [4] P. Seiler *et al.*, "H9N2 influenza viruses from Bangladesh: Transmission in  
554 chicken and New World quail," *Influenza Other Respir Viruses*, vol. 12, no. 6,  
555 pp. 814-817, Nov 2018, doi: 10.1111/irv.12589.
- 556 [5] A. Nagy, T. C. Mettenleiter, and E. M. Abdelwhab, "A brief summary of the  
557 epidemiology and genetic relatedness of avian influenza H9N2 virus in birds  
558 and mammals in the Middle East and North Africa," *Epidemiol Infect*, vol. 145,  
559 no. 16, pp. 3320-3333, Dec 2017, doi: 10.1017/S0950268817002576.
- 560 [6] T. Jeevan *et al.*, "A(H9N2) influenza viruses associated with chicken mortality  
561 in outbreaks in Algeria 2017," *Influenza Other Respir Viruses*, vol. 13, no. 6, pp.  
562 622-626, Nov 2019, doi: 10.1111/irv.12675.
- 563 [7] M. Jonas *et al.*, "Identification of avian influenza virus subtype H9N2 in chicken  
564 farms in Indonesia," *Prev Vet Med*, vol. 159, pp. 99-105, Nov 1 2018, doi:  
565 10.1016/j.prevetmed.2018.09.003.
- 566 [8] T. H. P. Peacock, J. James, J. E. Sealy, and M. Iqbal, "A Global Perspective on  
567 H9N2 Avian Influenza Virus," *Viruses*, vol. 11, no. 7, Jul 5 2019, doi:  
568 10.3390/v11070620.
- 569 [9] S. Carnaccini and D. R. Perez, "H9 Influenza Viruses: An Emerging Challenge,"  
570 *Cold Spring Harb Perspect Med*, vol. 10, no. 6, Jun 1 2020, doi:  
571 10.1101/cshperspect.a038588.
- 572 [10] J. A. Kim, S. H. Cho, H. S. Kim, and S. H. Seo, "H9N2 influenza viruses isolated  
573 from poultry in Korean live bird markets continuously evolve and cause the  
574 severe clinical signs in layers," *Vet Microbiol*, vol. 118, no. 3-4, pp. 169-76, Dec  
575 20 2006, doi: 10.1016/j.vetmic.2006.07.007.
- 576 [11] J. Wang *et al.*, "Apoptosis induction and release of inflammatory cytokines in  
577 the oviduct of egg-laying hens experimentally infected with H9N2 avian



- 578 influenza virus," *Vet Microbiol*, vol. 177, no. 3-4, pp. 302-14, Jun 12 2015, doi:  
579 10.1016/j.vetmic.2015.04.005.
- 580 [12] X. Qi *et al.*, "Deterioration of eggshell quality in laying hens experimentally  
581 infected with H9N2 avian influenza virus," *Vet Res*, vol. 47, p. 35, Feb 25 2016,  
582 doi: 10.1186/s13567-016-0322-4.
- 583 [13] M. J. Pantin-Jackwood and D. E. Swayne, "Pathogenesis and pathobiology of  
584 avian influenza virus infection in birds," *Rev Sci Tech*, vol. 28, no. 1, pp. 113-  
585 36, Apr 2009. Available: <https://www.ncbi.nlm.nih.gov/pubmed/19618622>.
- 586 [14] D. E. Swayne and M. Pantin-Jackwood, "Pathogenicity of avian influenza  
587 viruses in poultry," *Dev Biol (Basel)*, vol. 124, pp. 61-7, 2006. Available:  
588 <https://www.ncbi.nlm.nih.gov/pubmed/16447495>.
- 589 [15] H. Nili and K. Asasi, "Avian influenza (H9N2) outbreak in Iran," *Avian Dis*, vol.  
590 47, no. 3 Suppl, pp. 828-31, 2003, doi: 10.1637/0005-2086-47.s3.828.
- 591 [16] H. Nili and K. Asasi, "Natural cases and an experimental study of H9N2 avian  
592 influenza in commercial broiler chickens of Iran," *Avian Pathol*, vol. 31, no. 3,  
593 pp. 247-52, Jun 2002, doi: 10.1080/03079450220136567.
- 594 [17] N. Kishida, Y. Sakoda, M. Eto, Y. Sunaga, and H. Kida, "Co-infection of  
595 *Staphylococcus aureus* or *Haemophilus paragallinarum* exacerbates H9N2  
596 influenza A virus infection in chickens," *Arch Virol*, vol. 149, no. 11, pp. 2095-  
597 104, Nov 2004, doi: 10.1007/s00705-004-0372-1.
- 598 [18] A. M. Abdelaziz, M. H. A. Mohamed, M. M. Fayez, T. Al-Marri, I. Qasim, and A.  
599 A. Al-Amer, "Molecular survey and interaction of common respiratory  
600 pathogens in chicken flocks (field perspective)," *Vet World*, vol. 12, no. 12, pp.  
601 1975-1986, Dec 2019, doi: 10.14202/vetworld.2019.1975-1986.

- 602 [19] L. V. Tse and G. R. Whittaker, "Modification of the hemagglutinin cleavage site  
603 allows indirect activation of avian influenza virus H9N2 by bacterial  
604 staphylokinase," *Virology*, vol. 482, pp. 1-8, Aug 2015, doi:  
605 10.1016/j.virol.2015.03.023.
- 606 [20] A. Ramezani and D. S. Raj, "The gut microbiome, kidney disease, and targeted  
607 interventions," *J Am Soc Nephrol*, vol. 25, no. 4, pp. 657-70, Apr 2014, doi:  
608 10.1681/ASN.2013080905.
- 609 [21] F. Scheperjans *et al.*, "Gut microbiome are related to Parkinson's disease and  
610 clinical phenotype," *Mov Disord*, vol. 30, no. 3, pp. 350-8, Mar 2015, doi:  
611 10.1002/mds.26069.
- 612 [22] K. F. Budden *et al.*, "Emerging pathogenic links between microbiome and the  
613 gut-lung axis," *Nat Rev Microbiol*, vol. 15, no. 1, pp. 55-63, Jan 2017, doi:  
614 10.1038/nrmicro.2016.142.
- 615 [23] A. R. Sonawane *et al.*, "Microbiome-Transcriptome Interactions Related to  
616 Severity of Respiratory Syncytial Virus Infection," *Sci Rep*, vol. 9, no. 1, p.  
617 13824, Sep 25 2019, doi: 10.1038/s41598-019-50217-w.
- 618 [24] J. R. Yaron *et al.*, "Immune protection is dependent on the gut microbiome in a  
619 lethal mouse gammaherpesviral infection," *Sci Rep*, vol. 10, no. 1, p. 2371, Feb  
620 11 2020, doi: 10.1038/s41598-020-59269-9.
- 621 [25] K. H. Lee *et al.*, "The respiratory microbiome and susceptibility to influenza virus  
622 infection," *PLoS One*, vol. 14, no. 1, p. e0207898, 2019, doi:  
623 10.1371/journal.pone.0207898.
- 624 [26] J. K. Pfeiffer and H. W. Virgin, "Viral immunity. Transkingdom control of viral  
625 infection and immunity in the mammalian intestine," *Science*, vol. 351, no.  
626 6270, Jan 15 2016, doi: 10.1126/science.aad5872.

- 627 [27] T. Ding *et al.*, "Microbial Composition of the Human Nasopharynx Varies  
628 According to Influenza Virus Type and Vaccination Status," *mBio*, vol. 10, no.  
629 4, Jul 2 2019, doi: 10.1128/mBio.01296-19.
- 630 [28] Y. Belkaid and O. J. Harrison, "Homeostatic Immunity and the Microbiome,"  
631 *Immunity*, vol. 46, no. 4, pp. 562-576, Apr 18 2017, doi:  
632 10.1016/j.immuni.2017.04.008.
- 633 [29] A. Yitbarek *et al.*, "Gut microbiome-mediated protection against influenza virus  
634 subtype H9N2 in chickens is associated with modulation of the innate  
635 responses," *Sci Rep*, vol. 8, no. 1, p. 13189, Sep 4 2018, doi: 10.1038/s41598-  
636 018-31613-0.
- 637 [30] H. Li *et al.*, "Avian Influenza Virus Subtype H9N2 Affects Intestinal Microbiome,  
638 Barrier Structure Injury, and Inflammatory Intestinal Disease in the Chicken  
639 Ileum," *Viruses*, vol. 10, no. 5, May 18 2018, doi: 10.3390/v10050270.
- 640 [31] N. Cui *et al.*, "Newcastle Disease Virus Infection Interferes With the Formation  
641 of Intestinal Microflora in Newly Hatched Specific-Pathogen-Free Chicks," *Front*  
642 *Microbiol*, vol. 9, p. 900, 2018, doi: 10.3389/fmicb.2018.00900.
- 643 [32] P. Xu *et al.*, "A Multi-Omics Study of Chicken Infected by Nephropathogenic  
644 Infectious Bronchitis Virus," *Viruses*, vol. 11, no. 11, Nov 16 2019, doi:  
645 10.3390/v11111070.
- 646 [33] M. Oejo, B. Oporto, and A. Hurtado, "16S rRNA amplicon sequencing  
647 characterization of caecal microbiome composition of broilers and free-range  
648 slow-growing chickens throughout their productive lifespan," *Sci Rep*, vol. 9,  
649 no. 1, p. 2506, Feb 21 2019, doi: 10.1038/s41598-019-39323-x.
- 650 [34] V. Clavijo and M. J. V. Florez, "The gastrointestinal microbiome and its  
651 association with the control of pathogens in broiler chicken production: A

- 652 review," *Poult Sci*, vol. 97, no. 3, pp. 1006-1021, Mar 1 2018, doi:  
653 10.3382/ps/pex359.
- 654 [35] A. A. Khan *et al.*, "Polymorphic Immune Mechanisms Regulate Commensal  
655 Repertoire," *Cell Rep*, vol. 29, no. 3, pp. 541-550 e4, Oct 15 2019, doi:  
656 10.1016/j.celrep.2019.09.010.
- 657 [36] J. Zhang *et al.*, "Transcriptome Analysis in Spleen Reveals Differential  
658 Regulation of Response to Newcastle Disease Virus in Two Chicken Lines,"  
659 *Sci Rep*, vol. 8, no. 1, p. 1278, Jan 19 2018, doi: 10.1038/s41598-018-19754-  
660 8.
- 661 [37] A. P. Del Vesco, M. G. Kaiser, M. S. Monson, H. Zhou, and S. J. Lamont,  
662 "Genetic responses of inbred chicken lines illustrate importance of eIF2 family  
663 and immune-related genes in resistance to Newcastle disease virus," *Sci Rep*,  
664 vol. 10, no. 1, p. 6155, Apr 9 2020, doi: 10.1038/s41598-020-63074-9.
- 665 [38] M. S. Deist *et al.*, "Novel Mechanisms Revealed in the Trachea Transcriptome  
666 of Resistant and Susceptible Chicken Lines following Infection with Newcastle  
667 Disease Virus," *Clin Vaccine Immunol*, vol. 24, no. 5, May 2017, doi:  
668 10.1128/CVI.00027-17.
- 669 [39] M. S. Deist *et al.*, "Novel analysis of the Harderian gland transcriptome  
670 response to Newcastle disease virus in two inbred chicken lines," *Sci Rep*, vol.  
671 8, no. 1, p. 6558, Apr 26 2018, doi: 10.1038/s41598-018-24830-0.
- 672 [40] Y. Wang, B. Lupiani, S. M. Reddy, S. J. Lamont, and H. Zhou, "RNA-seq  
673 analysis revealed novel genes and signaling pathway associated with disease  
674 resistance to avian influenza virus infection in chickens," *Poult Sci*, vol. 93, no.  
675 2, pp. 485-93, Feb 2014, doi: 10.3382/ps.2013-03557.

- 676 [41] J. H. Cheeseman, M. G. Kaiser, C. Ciraci, P. Kaiser, and S. J. Lamont, "Breed  
677 effect on early cytokine mRNA expression in spleen and cecum of chickens  
678 with and without *Salmonella enteritidis* infection," *Dev Comp Immunol*, vol. 31,  
679 no. 1, pp. 52-60, 2007, doi: 10.1016/j.dci.2006.04.001.
- 680 [42] D. K. Kim *et al.*, "Immune-related gene expression in two B-complex disparate  
681 genetically inbred Fayoumi chicken lines following *Eimeria maxima* infection,"  
682 *Poult Sci*, vol. 87, no. 3, pp. 433-43, Mar 2008, doi: 10.3382/ps.2007-00383.
- 683 [43] M. K. Malys, L. Campbell, and N. Malys, "Symbiotic and antibiotic interactions  
684 between gut commensal microbiome and host immune system," *Medicina*  
685 (*Kaunas*), vol. 51, no. 2, pp. 69-75, 2015, doi: 10.1016/j.medici.2015.03.001.
- 686 [44] B. Das and G. B. Nair, "Homeostasis and dysbiosis of the gut microbiome in  
687 health and disease," *J Biosci*, vol. 44, no. 5, Oct 2019. [Online]. Available:  
688 <https://www.ncbi.nlm.nih.gov/pubmed/31719226>.
- 689 [45] F. D. D. Aleman and D. R. Valenzano, "Microbiome evolution during host  
690 aging," *PLoS Pathog*, vol. 15, no. 7, p. e1007727, Jul 2019, doi:  
691 10.1371/journal.ppat.1007727.
- 692 [46] G. T. Uhr, L. Dohnalova, and C. A. Thaiss, "The Dimension of Time in Host-  
693 Microbiome Interactions," *mSystems*, vol. 4, no. 1, Jan-Feb 2019, doi:  
694 10.1128/mSystems.00216-18.
- 695 [47] Y. Belkaid and T. W. Hand, "Role of the microbiome in immunity and  
696 inflammation," *Cell*, vol. 157, no. 1, pp. 121-41, Mar 27 2014, doi:  
697 10.1016/j.cell.2014.03.011.
- 698 [48] M. K. Jones *et al.*, "Enteric bacteria promote human and mouse norovirus  
699 infection of B cells," *Science*, vol. 346, no. 6210, pp. 755-9, Nov 7 2014, doi:  
700 10.1126/science.1257147.

- 701 [49] L. B. Thackray *et al.*, "Oral Antibiotic Treatment of Mice Exacerbates the  
702 Disease Severity of Multiple Flavivirus Infections," *Cell Rep*, vol. 22, no. 13, pp.  
703 3440-3453 e6, Mar 27 2018, doi: 10.1016/j.celrep.2018.03.001.
- 704 [50] S. J. Lee *et al.*, "Comparison of microbiome in the cloaca, colon, and magnum  
705 of layer chicken," *PLoS One*, vol. 15, no. 8, p. e0237108, 2020, doi:  
706 10.1371/journal.pone.0237108.
- 707 [51] L. Glendinning, G. McLachlan, and L. Vervelde, "Age-related differences in the  
708 respiratory microbiome of chickens," *PLoS One*, vol. 12, no. 11, p. e0188455,  
709 2017, doi: 10.1371/journal.pone.0188455.
- 710 [52] I. Rychlik, "Composition and Function of Chicken Gut Microbiome," *Animals*  
711 (*Basel*), vol. 10, no. 1, Jan 8 2020, doi: 10.3390/ani10010103.
- 712 [53] Y. Xi *et al.*, "Characteristics of the intestinal flora of specific pathogen free  
713 chickens with age," *Microb Pathog*, vol. 132, pp. 325-334, Jul 2019, doi:  
714 10.1016/j.micpath.2019.05.014.
- 715 [54] P.-J. M. Swayne DE, "Pathobiology of avian influenza virus infections in birds  
716 and mammals," *In: Swayne DE (ed) Avian influenza, 1st edn. Blackwell*  
717 *Publishing, Ames, pp 87–122, 2008.*
- 718 [55] S. D. Swayne DE, Sims LD, "Influenza," *In: Swayne DE, Glisson JR,*  
719 *McDougald LR, Nolan LK, Suarez DL, Nair V (eds). Diseases of poultry, 13th*  
720 *edn. Wiley, Ames, pp 191–218, 2013.*
- 721 [56] H. T. Groves, S. L. Higham, M. F. Moffatt, M. J. Cox, and J. S. Tregoning,  
722 "Respiratory Viral Infection Alters the Gut Microbiome by Inducing  
723 Inappetence," *mBio*, vol. 11, no. 1, Feb 18 2020, doi: 10.1128/mBio.03236-19.
- 724 [57] E. A. Germeraad, P. Sanders, T. J. Hagenaars, M. C. M. Jong, N. Beerens, and  
725 J. L. Gonzales, "Virus Shedding of Avian Influenza in Poultry: A Systematic

- 726 Review and Meta-Analysis," *Viruses*, vol. 11, no. 9, Sep 2 2019, doi:  
727 10.3390/v11090812.
- 728 [58] R. Ruiz-Hernandez *et al.*, "Host genetics determine susceptibility to avian  
729 influenza infection and transmission dynamics," *Sci Rep*, vol. 6, p. 26787, Jun  
730 9 2016, doi: 10.1038/srep26787.
- 731 [59] M. Iqbal, T. Yaqub, N. Mukhtar, M. Z. Shabbir, and J. W. McCauley, "Infectivity  
732 and transmissibility of H9N2 avian influenza virus in chickens and wild terrestrial  
733 birds," *Vet Res*, vol. 44, p. 100, Oct 17 2013, doi: 10.1186/1297-9716-44-100.
- 734 [60] N. Zhao *et al.*, "Influence of Novel Highly Pathogenic Avian Influenza A (H5N1)  
735 Virus Infection on Migrating Whooper Swans Fecal Microbiome," *Front Cell*  
736 *Infect Microbiol*, vol. 8, p. 46, 2018, doi: 10.3389/fcimb.2018.00046.
- 737 [61] S. M. Hird, H. Ganz, J. A. Eisen, and W. M. Boyce, "The Cloacal Microbiome of  
738 Five Wild Duck Species Varies by Species and Influenza A Virus Infection  
739 Status," *mSphere*, vol. 3, no. 5, Oct 24 2018, doi: 10.1128/mSphere.00382-18.
- 740 [62] A. Yitbarek, J. S. Weese, T. N. Alkie, J. Parkinson, and S. Sharif, "Influenza A  
741 virus subtype H9N2 infection disrupts the composition of intestinal microbiome  
742 of chickens," *FEMS Microbiol Ecol*, vol. 94, no. 1, Jan 1 2018, doi:  
743 10.1093/femsec/fix165.
- 744 [63] S. Park *et al.*, "Effects of heat-killed *Lactobacillus plantarum* against influenza  
745 viruses in mice," *J Microbiol*, vol. 56, no. 2, pp. 145-149, Feb 2018, doi:  
746 10.1007/s12275-018-7411-1.
- 747 [64] N. Belkacem *et al.*, "Lactobacillus paracasei feeding improves immune control  
748 of influenza infection in mice," *PLoS One*, vol. 12, no. 9, p. e0184976, 2017,  
749 doi: 10.1371/journal.pone.0184976.

- 750 [65] Y. J. Jung *et al.*, "Heat-killed *Lactobacillus casei* confers broad protection  
751 against influenza A virus primary infection and develops heterosubtypic  
752 immunity against future secondary infection," *Sci Rep*, vol. 7, no. 1, p. 17360,  
753 Dec 12 2017, doi: 10.1038/s41598-017-17487-8.
- 754 [66] E. Hoffmann, G Neumann, G Hobom, R G Webster, Y Kawaoka. "Ambisense"  
755 approach for the generation of influenza A virus: vRNA and mRNA synthesis  
756 from one template" *Virology* vol. 267, p. 310-317, 2000
- 757 [67] H. Wickham. *ggplot2: Elegant Graphics for Data Analysis*. Springer-Verlag New  
758 York, 2016
- 759 [68] J.C. Pedersen, "Hemagglutination-inhibition test for avian influenza virus  
760 subtype identification and the detection and quantitation of serum antibodies to  
761 the avian influenza virus" *Methods Mol Biol*, vol. 437, p. 53-66, 2008, doi:  
762 10.1007/978-1-59745-279-3\_8.

## 763 **Figure Legends**

764 Figure 1. Oropharyngeal virus shedding from chickens after challenge with H9N2 AIV  
765 A/chicken/Pakistan/UDL01/08. (A). Viral titre recovered from oral swabs at day 2 (D2),  
766 4 (D4), 5 (D5), 6 (D6) post AIV challenge from SPF RIR chickens (Experiment 1). (B).  
767 Viral titre recovered from oral swabs at day 2 (D2), 4 (D4), 5 (D5), 6 (D6) post  
768 challenge from SPF RIR and SPF VALO chickens (Experiment 2). Viral titres are  
769 expressed as log<sub>10</sub> plaque forming units (PFU) per ml. A dashed line indicates the  
770 lower limit of detection for the plaque assay carried out on MDCK cells, 0.9 log<sub>10</sub> PFU  
771 per ml.

772 Figure 2. Chicken colon microbiome alpha diversity indices (A, B, C) and simple linear  
773 regression plots (D, E, F) for H9N2 infected RIR chickens compared to uninfected RIR



774 chickens. SPF RIR chickens were challenged with H9N2 AIV  
775 A/chicken/Pakistan/UDL01/08. Colon samples were collected at day 0 (pre-  
776 challenge), day two, day four and day ten post challenge from H9N2 infected group  
777 and non-infected control groups. (A) The number of observed bacteria taxa (OTUs) in  
778 different experimental groups. (B) Faith's phylogenetic diversity in different  
779 experimental groups. (C) Shannon indices in the different groups. Kruskal Wallis  
780 pairwise statistics were used to assess differences in community richness; \*  $P \leq 0.05$ .  
781 Only statistical differences between the groups at each time point are marked on the  
782 graph. The bottom row of linear regression plots show the change in relative  
783 abundance (D), phylogenetic diversity (E), Shannon index (F) from time t to time t+1  
784 (y-axis) in H9N2 AIV A/chicken/Pakistan/UDL01/08 infected and control groups

785 Figure 3. Alpha diversity indices of colon microbiome compared for two divergent  
786 chicken lines, RIR and VALO. (A) The number of observed bacteria taxa (OTUs) at  
787 different time points post infection. (B) Faith's phylogenetic diversity at different time  
788 points post infection. (C) Shannon indices at different time points post infection. The  
789 bottom row of linear regression plots shows the change in relative abundance (D),  
790 phylogenetic diversity (E), Shannon index (F) from time t to time t+1 (y-axis). Colon  
791 samples were collected pre-challenge, at day 0 of experiment, (D0) and day 3 (D3)  
792 and day 14 post challenge (D14). Chickens were challenge with recombinant  
793 A/chicken/Pakistan/UDL01/08 H9N2 LPAIV. Kruskal Wallis pairwise statistics were  
794 used to assess differences in community richness; \*  $P \leq 0.05$ .

795 Figure 4. Temporal changes in RIR and VALO chicken's colon microbiome. (A) The  
796 number of observed bacteria taxa (OTUs) at different time points. (B) Faith's  
797 phylogenetic diversity at different time. (C) Shannon indices at different time points.  
798 Kruskal Wallis pairwise statistics were used to assess differences in community

799 richness; \*  $P \leq 0.05$ . The bottom row of linear regression plots shows the change in  
800 relative abundance (D), phylogenetic diversity (E), Shannon index (F) from time  $t$  to  
801 time  $t+1$  (y-axis) over the time in two divergent chicken lines. Colon samples were  
802 collected at day 7 of age, day 14, day 21, day 28 and day 32 of age. Major changes in  
803 alpha diversity indices were seen in 14 days interval, especially between day 7 and  
804 day 21 of age.

805 Figure 5. Compositional principal coordinate analysis (PCA) plot of chicken colon  
806 microbiome using unweighted UniFrac distance data, categorized according to the  
807 time points and groups (Day\_Group). (A). PCA analysis of RIR and VALO chicken  
808 colon microbiome grouped by day. The samples were collected at day 7 of age (D7),  
809 day 14 (D14), day 21 (D21), day 28 (D28) and day 32 of age (D32). (B). PCA analysis  
810 of H9N2 infected and uninfected, control RIR chickens at day 0 (D0) pre-challenge,  
811 day 2 (D2), day 4 (D4) and day 10 post-challenge (D10). Chickens were challenge  
812 with recombinant A/chicken/Pakistan/UDL01/08 H9N2 LPAIV at D0 of experiment.  
813 (C). PCA analysis of H9N2 infected RIR and VALO chickens at day 0 pre-challenge  
814 (D0), day 3 (D3) and day 14 (D14) post-challenge. Chickens were challenge with  
815 recombinant A/chicken/Pakistan/UDL01/08 H9N2 LPAIV at D0 of experiment. PC1,  
816 PC2; percent variables explained (%).

817 Figure 6. Volcano plot for the analysis of composition of microbiomes (ANCOM) test.  
818 Significant bacterial taxa are above the line. Taxa on the top-left corner are distinct  
819 species but with small proportions, (low f-score). Truly different taxa are depicted as  
820 one moves towards the far right (high W-statistic). A. ANCOME test applied to control  
821 RIR and H9N2 infected RIR chickens (Experiment 1). B. ANCOME test applied to RIR  
822 and VALO H9N2 infected chickens (Experiment 2).

823 Figure 7. Linear discriminant analysis Effect Size (LEfSe) analysis identifying  
824 taxonomic differences in the colon microbiota of RIR H9N2 AIV infected and control  
825 chickens. (A) Cladogram using the LEfSe method indicating the phylogenetic  
826 distribution of colon microbiota associated with H9N2 infection in RIR chickens and  
827 control group at day 2 post-challenge. Histogram of LDA scores of 16S gene  
828 sequences in H9N2 infected chickens at day 2 (A) and at day 4 post challenge (B)  
829 and respective control groups. LDA scores ( $\log_{10}$ ) above 3.0 and  $P < 0.05$  are shown.  
830 Chickens were challenge with A/chicken/Pakistan/UDL01/08 H9N2 LPAIV.

831

832



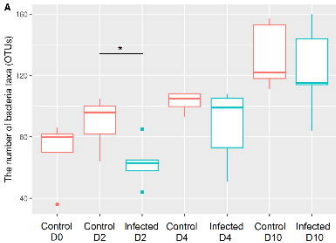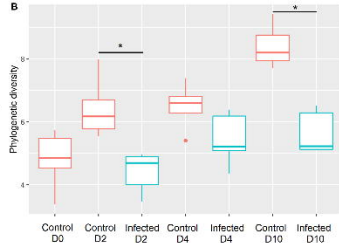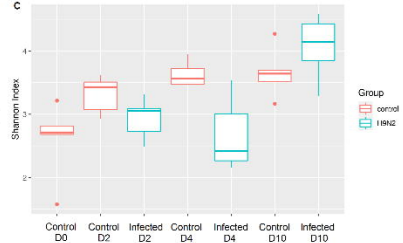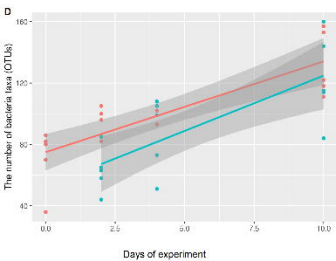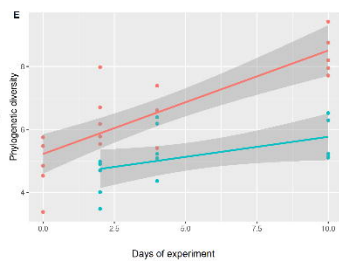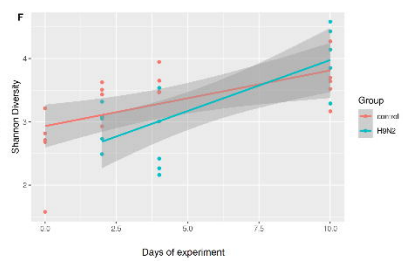

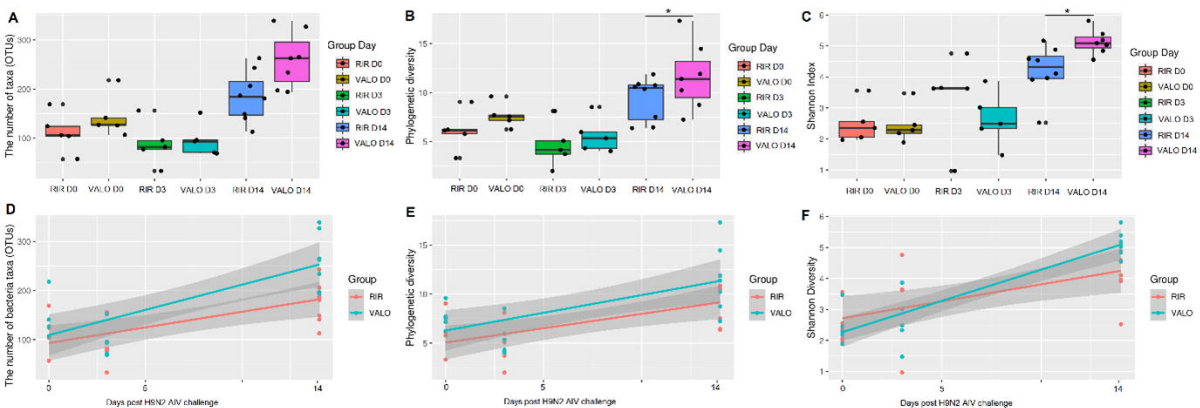

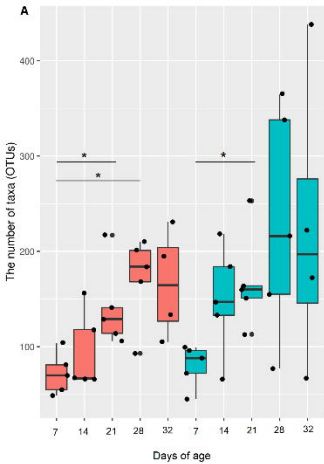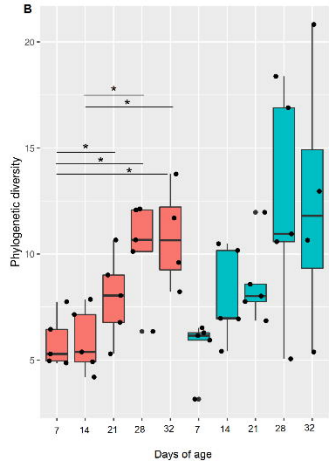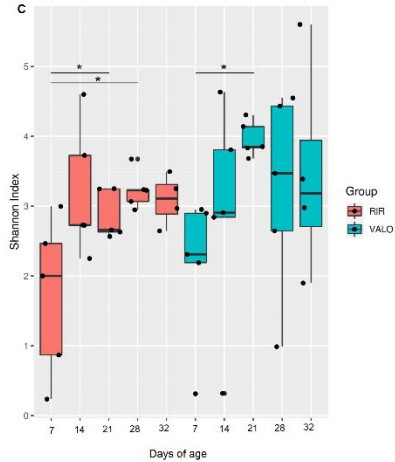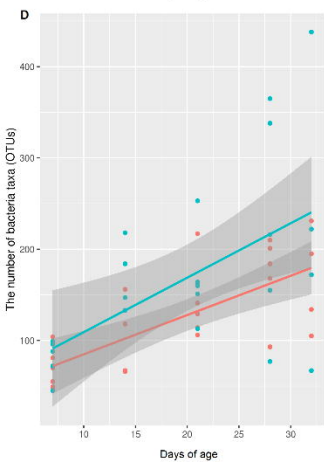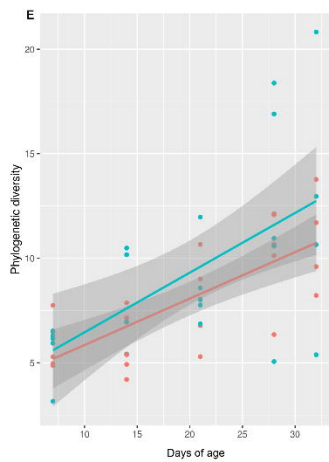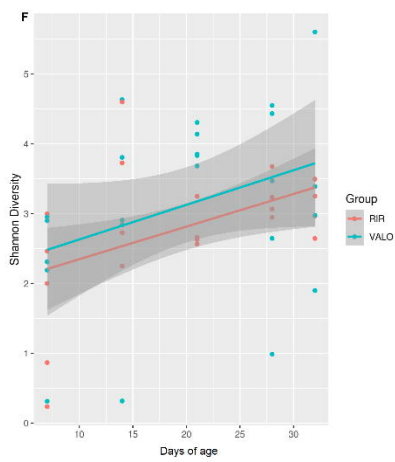

**A**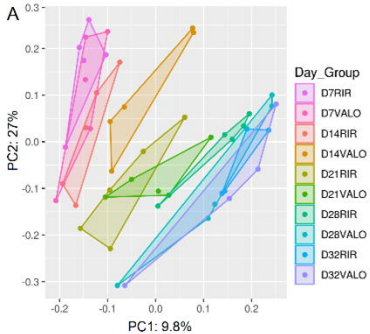**B**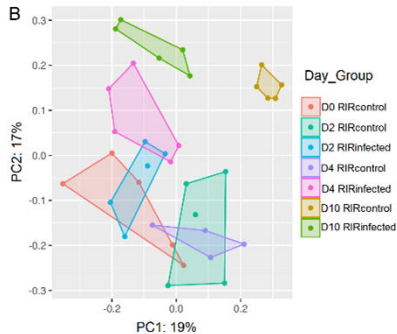**C**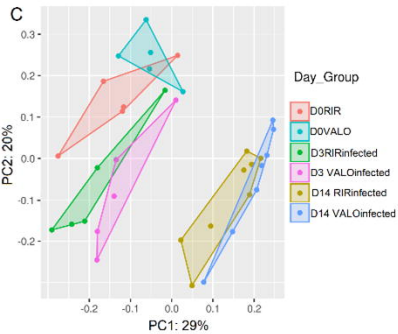



**A****Ancom Volcano Plot**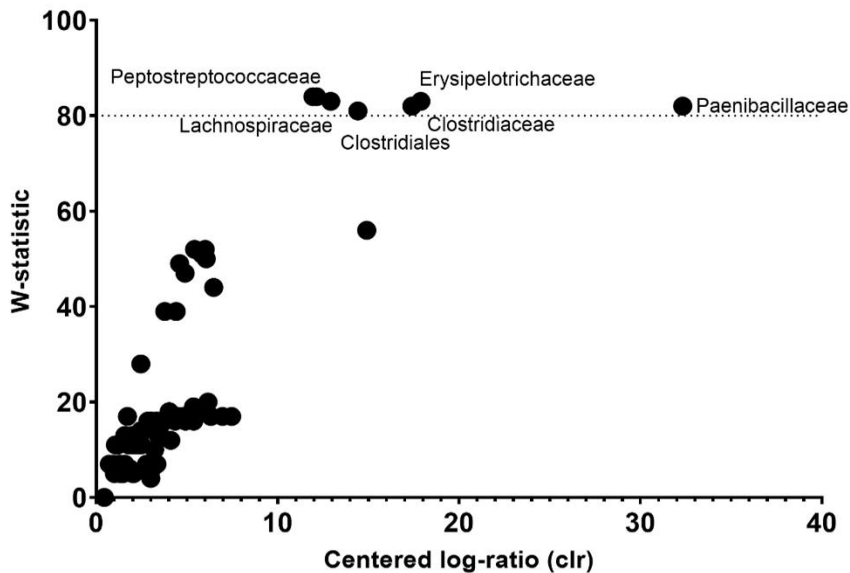**B****Ancom Volcano Plot**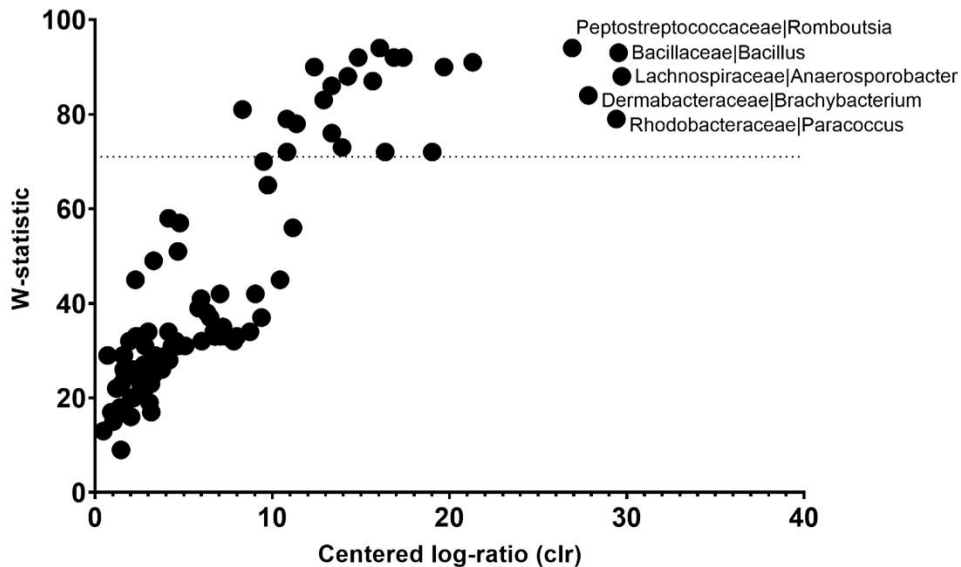

**A**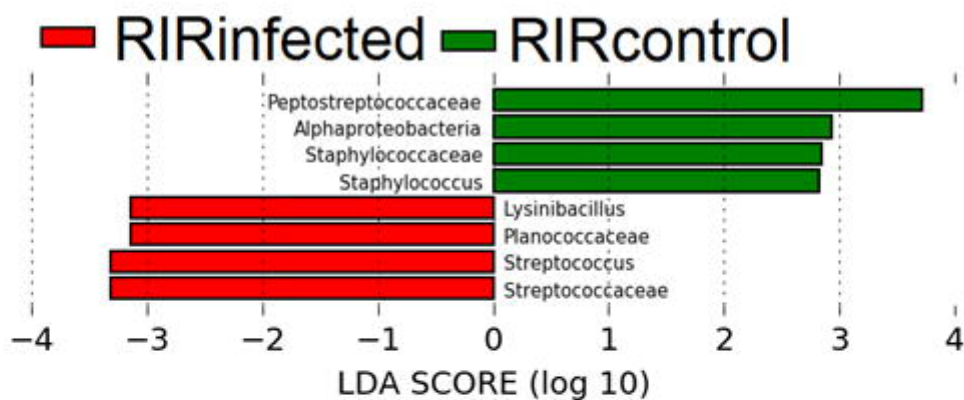**B**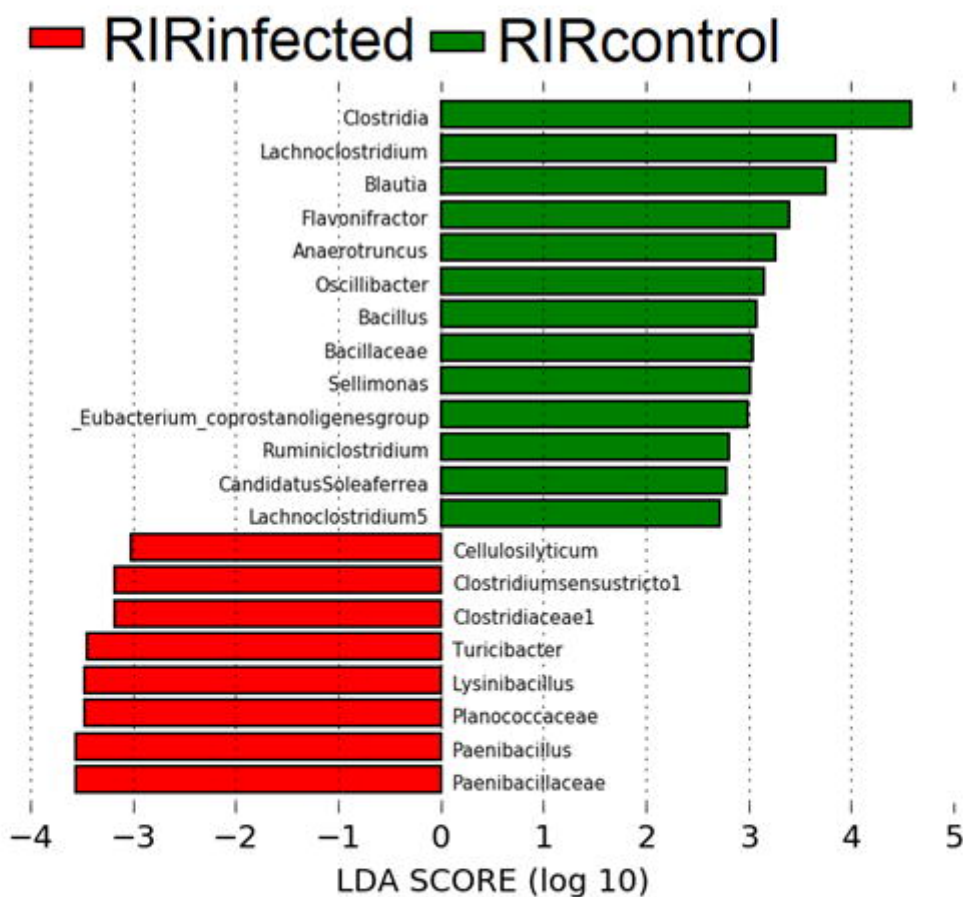

A

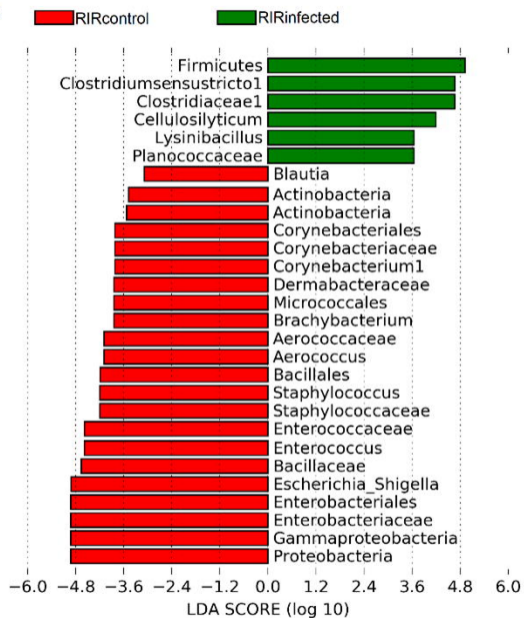

B

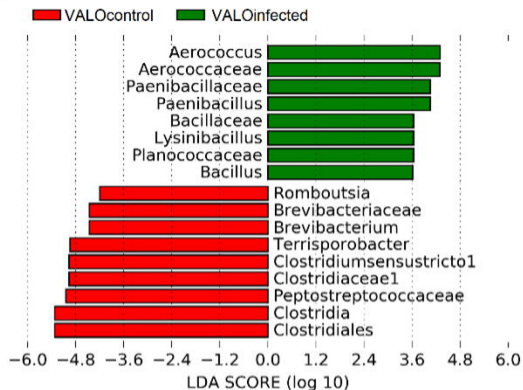

Source: http://biorxiv.org/content/10.1101/2021.03.15.435422v1.full.pdf
